# Supplementary material for: Extracellular Matrix Expression in Human Pancreatic Fat Cells of Patients with Normal Glucose Regulation, Prediabetes and Type 2 Diabetes
Source: MDPI journal article supplement (doi:10.3390/ijms241311169), 2023-07-06
Supplement: s1 [file s1]

| Gene           | Forward primer sequence     | Reverse primer sequence      | Probe |
|----------------|-----------------------------|------------------------------|-------|
| <b>COL I</b>   | 5-TATTGCTGGACAGCGTGGT-3     | 5-ACCTTGTTTGCCAGGTTTAC-3     | 72    |
| <b>COL III</b> | 5-GAGGCCCTCCTGGAGTTG-3      | 5-GGAAGACCACGAGCACCA-3       | 62    |
| <b>COL VI</b>  | 5-GAAGAGAAGGCCCCGTTG-3      | 5-CGGTAGCCTTTAGGTCCGATA-3    | 80    |
| <b>USH2A</b>   | 5-GACACAACAAGCCAGCCATA-3    | 5-AGAGGCAAGCAGCGATCA-3       | 83    |
| <b>DPT</b>     | 5-CGAGGAGCAACAACCACTTT-3    | 5-CGGCACATTATGAACTTCCA-3     | 65    |
| <b>FN</b>      | 5-ACTGGAGTGCTCACAGTCTCC-3   | 5-CGTTTGTAGGGGTTGTGGTAAT-3   | 55    |
| <b>Decorin</b> | 5-CCAATATCACCAGCATTCCTC-3   | 5-TTGTTGCCATCAAGATGTAATTC-3  | 69    |
| <b>COL IV</b>  | 5-GACCCCCGGGAGAAATAG-3      | 5-TTTGAAAAAGCAATGGCACTC-3    | 37    |
| <b>Laminin</b> | 5-TGTCAAGAGCATGGATAATGAAA-3 | 5-CTAGGGGAAGGTGTGCTCTG-3     | 65    |
| <b>TGF-β1</b>  | 5-GCAGCACGTGGAGCTGTA-3      | 5-CAGCCGGTTGCTGAGGTA-3       | 72    |
| <b>αTGF</b>    | 5-AAAATTTTAGCGTGCTCACTGAC-3 | 5-TCAGTCTCTTGATGGCTGGA-3     | 45    |
| <b>MMP-1</b>   | 5-GCATATCGATGCTGCTCTTTC-3   | 5-GATAACCTGGATCCATAGATCGTT-3 | 47    |
| <b>MMP-2</b>   | 5-CCCCAAAACGGACAAAGAG-3     | 5-CTTCAGCACAAACAGGTTGC-3     | 43    |
| <b>MT-MMP</b>  | 5-CAGGAATGAGGATCTGAATGG-3   | 5-CCGAGGGGTCCTGGAAT-3        | 45    |
| <b>RPS13</b>   | 5-CCCCACTTGTTGAAGTTGA       | 5-ACACCATGTGAATCTCTCAGGA-3   | 68    |
| <b>TIMP-1</b>  | 5-GGCTGTGAGGAATGCACA-3      | 5-TGGAAGCCCTTTTCAGAGC-3      | 17    |
| <b>TIMP-2</b>  | 5-GAAGAGCCTGAACCACAGGT-3    | 5-CGGGGAGGAGATGTAGCAC-3      | 43    |
| <b>TIMP-3</b>  | 5-GCTGGAGGTCAACAAGTACCA-3   | 5-CACAGCCCCGTGTACATCT-3      | 62    |

**Supplementary Table S1:** Homo sapiens primers and probes for PCR amplification
