# Supplementary material for: Extracellular Matrix Expression in Human Pancreatic Fat Cells of Patients with Normal Glucose Regulation, Prediabetes and Type 2 Diabetes
Source: MDPI journal article supplement (doi:10.3390/ijms241311169), 2023-07-06

**Figure S1:** Relative mRNA levels in PPAs after treatment with 600  $\mu\text{g/ml}$  fetuin-A + 60  $\mu\text{mol/L}$  palmitate for 24h (black bars) versus untreated controls (white bars). **(A)** In PPAs isolated from subjects with NGR, **(B)** in PPAs isolated from subjects with PD and **(C)** in PPAs isolated from subjects with T2D.  $\Delta\text{CT}$  values are shown (related to the housekeeping gene *RPS13*). Data are expressed as mean  $\pm$  SEM (n=5-7, student's *t*-test, \* $p$ <0.05).

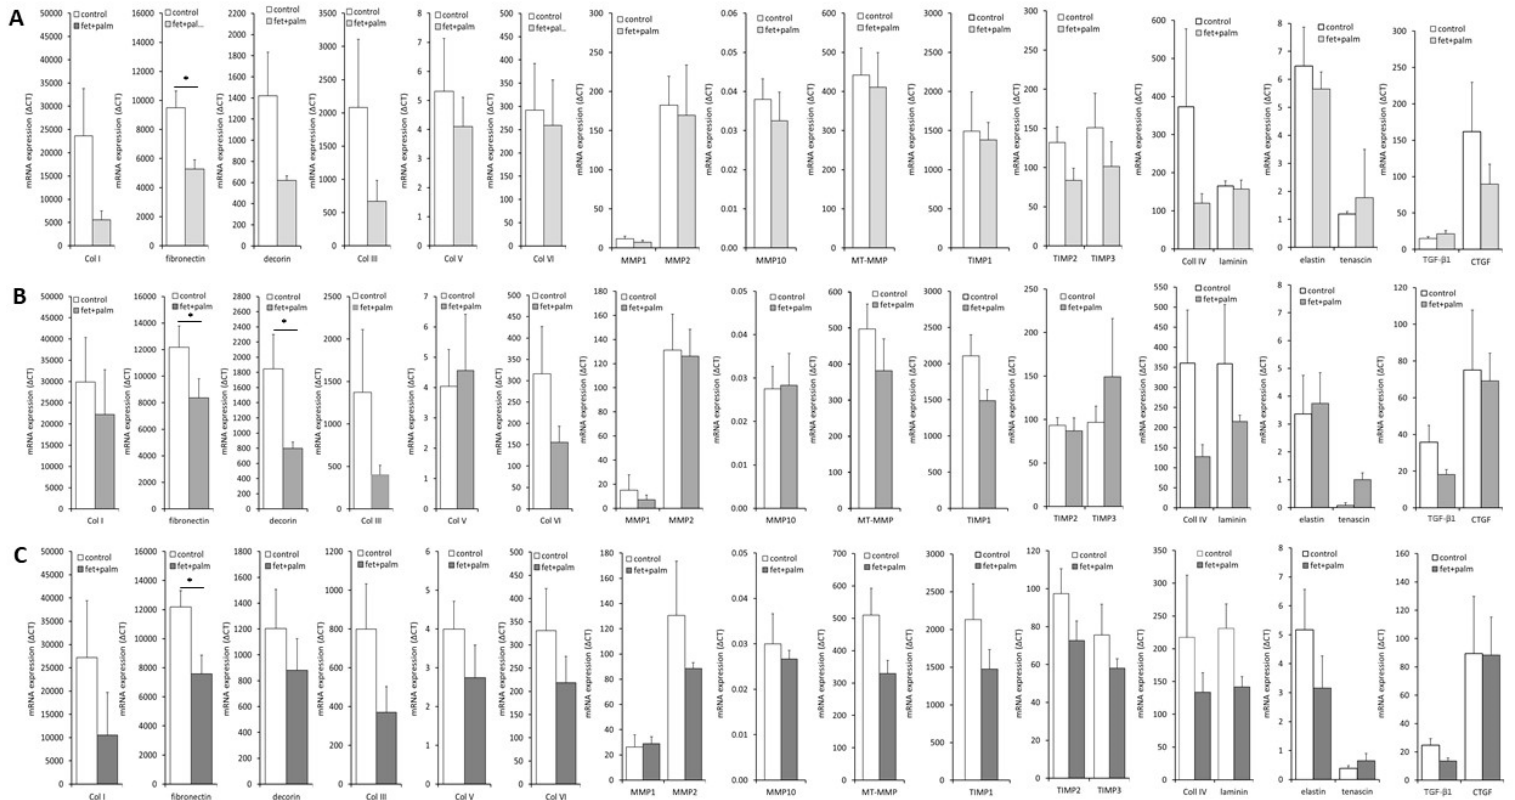

Supplement: s1 [file s1]
